# Supplementary material
Source: PubMed Central journal article supplement (PMC6659155)
Supplement: jamadermatol-155-1013-s001.pdf [file jamadermatol-155-1013-s001.pdf]

## Supplementary Online Content

Tan S, Seiger K, Renehan P, Mostaghimi A. Trends in private equity acquisition of dermatology practices in the United States. *JAMA Dermatol*. Published online July 24, 2019. doi:10.1001/jamadermatol.2019.1634

**eTable 1.** Database Search Strategy

**eTable 2.** Practice Acquisitions by State

This supplementary material has been provided by the authors to give readers additional information about their work.

**eTable 1.** Database Search Strategy

| <b>Source</b>      | <b>Search Criteria</b>                                                                                                                                                                                                                                                                                                                                                                                                                                                                                                                                                                                                                                                                                                                                              |
|--------------------|---------------------------------------------------------------------------------------------------------------------------------------------------------------------------------------------------------------------------------------------------------------------------------------------------------------------------------------------------------------------------------------------------------------------------------------------------------------------------------------------------------------------------------------------------------------------------------------------------------------------------------------------------------------------------------------------------------------------------------------------------------------------|
| <b>Capital IQ</b>  | Target primary geography (“United States”),<br>Announcement date of transactions (“All history”),<br>Industry primary classification (“Dermatology Services”)<br><i>Yield prior to exclusions: 128 transactions</i>                                                                                                                                                                                                                                                                                                                                                                                                                                                                                                                                                 |
| <b>CB Insights</b> | Advanced Search, Company Search, Industry & Geography<br>Geography (“United States, North America”)<br>Company Industries (“Healthcare,” “Medical Facilities & Services”)<br>Company Attributes, Keyword (“Dermatology”)<br>No Financing & Exit specifications selected<br>No date range selected<br><i>Yield prior to exclusions: 100 transactions</i>                                                                                                                                                                                                                                                                                                                                                                                                             |
| <b>Thomson ONE</b> | Screening & Analysis (“Private Equity,” “Companies & Investors”),<br>Search Entity Type (“Company”)<br>View in Currency (“USD - US Dollar”),<br>Search Currency (“USD – US Dollar”),<br>Entities Involved In (“All Private Equity Deals”),<br>Business Description (“Dermatology”),<br>Portfolio Status (“Currently PE/VC Backed,” “Formerly PE/VC Backed”),<br>Real Estate Properties (“Exclude”),<br>Disclosed Valuations Only? (“No”),<br>Investment Date (“Any Investment”),<br>Equity Amount (Mil) (“All”),<br>Investment Security Type (“Primary”),<br>Previous Investor (“All”),<br>Total Equity Invested by Fund (Mil) (“All”)<br><i>Yield prior to exclusions: 109 firms (with variable depth of information on investments and acquisitions for each)</i> |
| <b>Zephyr</b>      | Business description (“dermatology”),<br>Target address country (“US”),<br>US SIC (“801 - Offices and clinics of doctors of medicine”)<br><i>Yield prior to exclusions: 122 transactions</i>                                                                                                                                                                                                                                                                                                                                                                                                                                                                                                                                                                        |
| <b>PitchBook</b>   | The name of each DMG identified in the above databases                                                                                                                                                                                                                                                                                                                                                                                                                                                                                                                                                                                                                                                                                                              |
| <b>Google</b>      | Media/news tabs on the websites of DMGs,<br>Bloomberg and Crunchbase pages for DMGs,<br>PR Newswire and Businesswire articles for identified acquisitions                                                                                                                                                                                                                                                                                                                                                                                                                                                                                                                                                                                                           |

**eTable 2.** Practice Acquisitions by State

| <b>State</b>          | <b>Number of total clinics associated with practice acquisitions</b> | <b>Number of clinics associated with practices acquired from May 2012-May 2015</b> | <b>Number of clinics associated with practices acquired from June 2015-May 2018</b> |
|-----------------------|----------------------------------------------------------------------|------------------------------------------------------------------------------------|-------------------------------------------------------------------------------------|
| <b>Texas</b>          | 88                                                                   | 7                                                                                  | 81                                                                                  |
| <b>Florida</b>        | 50                                                                   | 28                                                                                 | 22                                                                                  |
| <b>Arizona</b>        | 31                                                                   | 4                                                                                  | 27                                                                                  |
| <b>Colorado</b>       | 21                                                                   | 9                                                                                  | 12                                                                                  |
| <b>Michigan</b>       | 19                                                                   | 9                                                                                  | 10                                                                                  |
| <b>North Carolina</b> | 19                                                                   | 7                                                                                  | 12                                                                                  |
| <b>Maryland</b>       | 17                                                                   | 1                                                                                  | 16                                                                                  |
| <b>Pennsylvania</b>   | 17                                                                   | 6                                                                                  | 11                                                                                  |
| <b>Nevada</b>         | 15                                                                   | 9                                                                                  | 6                                                                                   |
| <b>Illinois</b>       | 14                                                                   |                                                                                    | 14                                                                                  |
| <b>Virginia</b>       | 11                                                                   | 1                                                                                  | 10                                                                                  |
| <b>California</b>     | 11                                                                   | 5                                                                                  | 6                                                                                   |
| <b>Tennessee</b>      | 11                                                                   |                                                                                    | 11                                                                                  |
| <b>New York</b>       | 10                                                                   |                                                                                    | 10                                                                                  |
| <b>Missouri</b>       | 7                                                                    | 3                                                                                  | 4                                                                                   |
| <b>Oklahoma</b>       | 6                                                                    |                                                                                    | 6                                                                                   |
| <b>Wyoming</b>        | 4                                                                    |                                                                                    | 4                                                                                   |
| <b>Iowa</b>           | 4                                                                    |                                                                                    | 4                                                                                   |
| <b>Minnesota</b>      | 4                                                                    |                                                                                    | 4                                                                                   |
| <b>Oregon</b>         | 4                                                                    |                                                                                    | 4                                                                                   |
| <b>Kansas</b>         | 3                                                                    | 3                                                                                  |                                                                                     |
| <b>New Mexico</b>     | 3                                                                    |                                                                                    | 3                                                                                   |
| <b>Ohio</b>           | 2                                                                    | 1                                                                                  | 1                                                                                   |
| <b>Wisconsin</b>      | 2                                                                    | 2                                                                                  |                                                                                     |
| <b>Indiana</b>        | 2                                                                    |                                                                                    | 2                                                                                   |
| <b>New Jersey</b>     | 2                                                                    | 1                                                                                  | 1                                                                                   |
| <b>Arkansas</b>       | 1                                                                    |                                                                                    | 1                                                                                   |
| <b>Rhode Island</b>   | 1                                                                    |                                                                                    | 1                                                                                   |
| <b>Georgia</b>        | 1                                                                    | 1                                                                                  |                                                                                     |
| <b>South Carolina</b> | 1                                                                    | 1                                                                                  |                                                                                     |
